# Supplementary material for: Synthesis of hydroxypropyl cellulose derivatives modified with amphiphilic diblock copolymer side-chains for the slow release of volatile molecules
Source: Royal Society of Chemistry journal article supplement (doi:10.1039/c1py00195g), 2011-01-01

# Synthesis of hydroxypropyl cellulose derivatives modified with amphiphilic diblock copolymer side-chains for the slow release of volatile molecules

Damien Loïc Berthier,\* Andreas Herrmann nad Lahoussine Ouali

*Firmenich SA, Division Recherche et Développement, 1 Route des Jeunes, B.P. 239, CH-1211 Genève 8, Switzerland.*

Electronic Supplementary Information (ESI)

Fig. S1  $^{13}\text{C}$ -NMR of polymer **1** in  $\text{CDCl}_3$ .

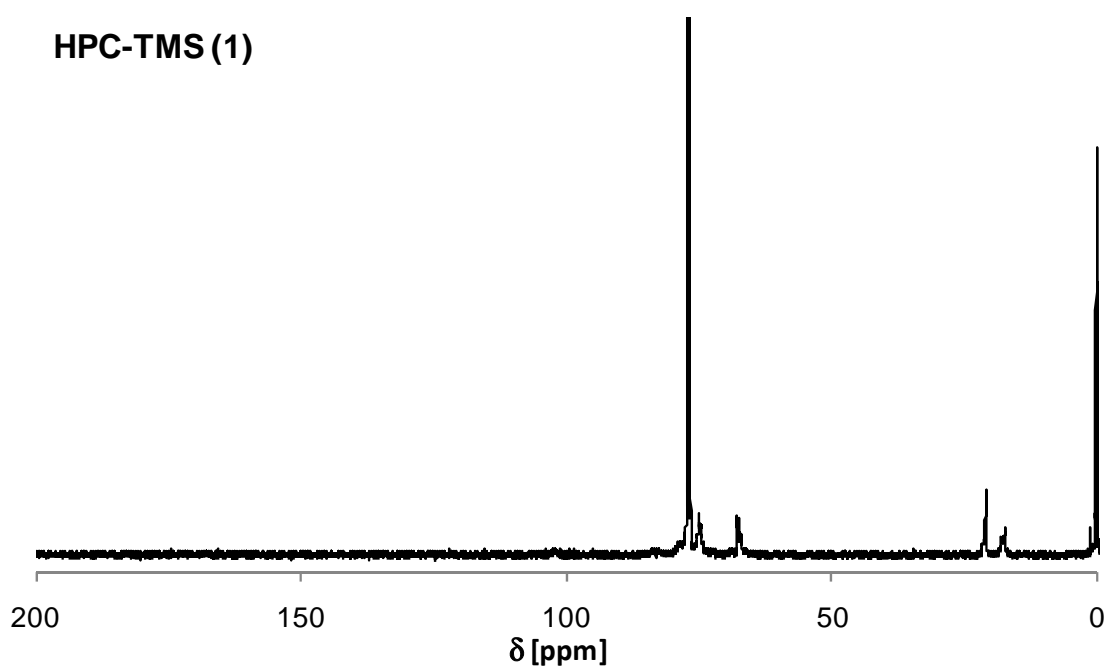

**Fig. S2**  $^{13}\text{C}$ -NMR of copolymer **2** in  $\text{CDCl}_3$ .

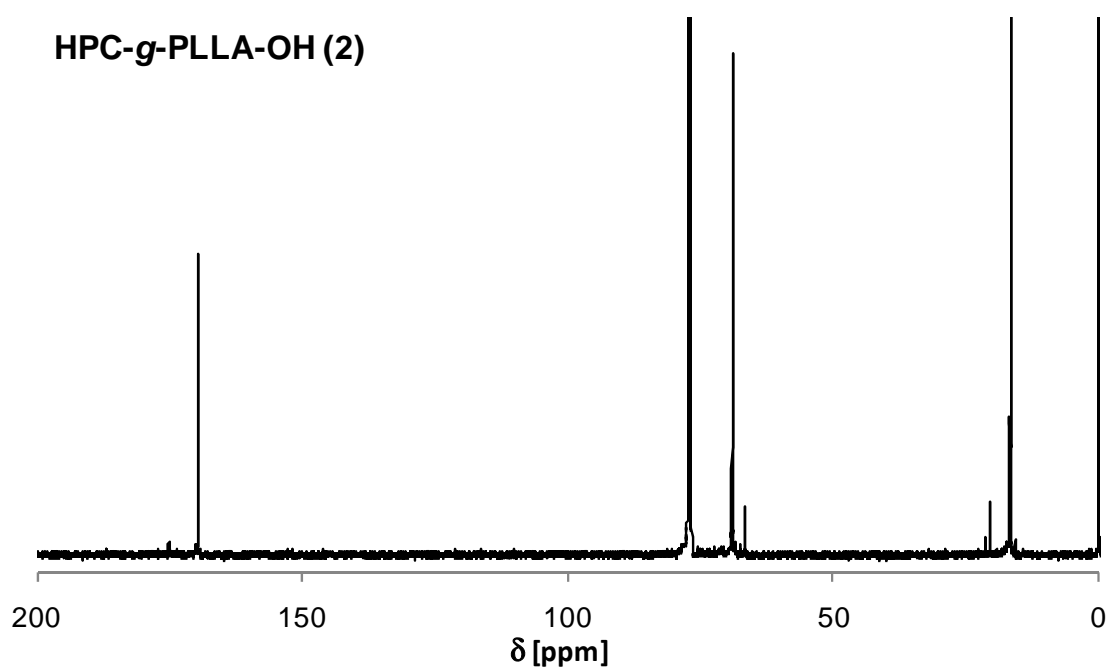

**Fig. S3**  $^{13}\text{C}$ -NMR of copolymer **3** in  $\text{CDCl}_3$ .

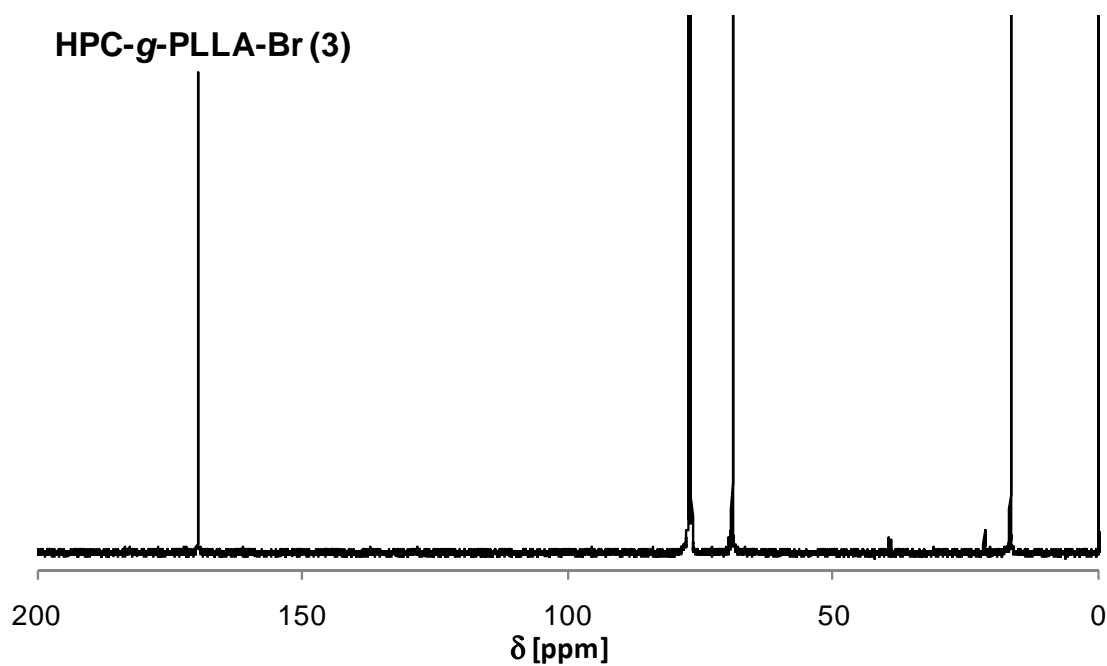

**Fig. S4**  $^{13}\text{C}$ -NMR of copolymer **4** in  $\text{CDCl}_3$ .

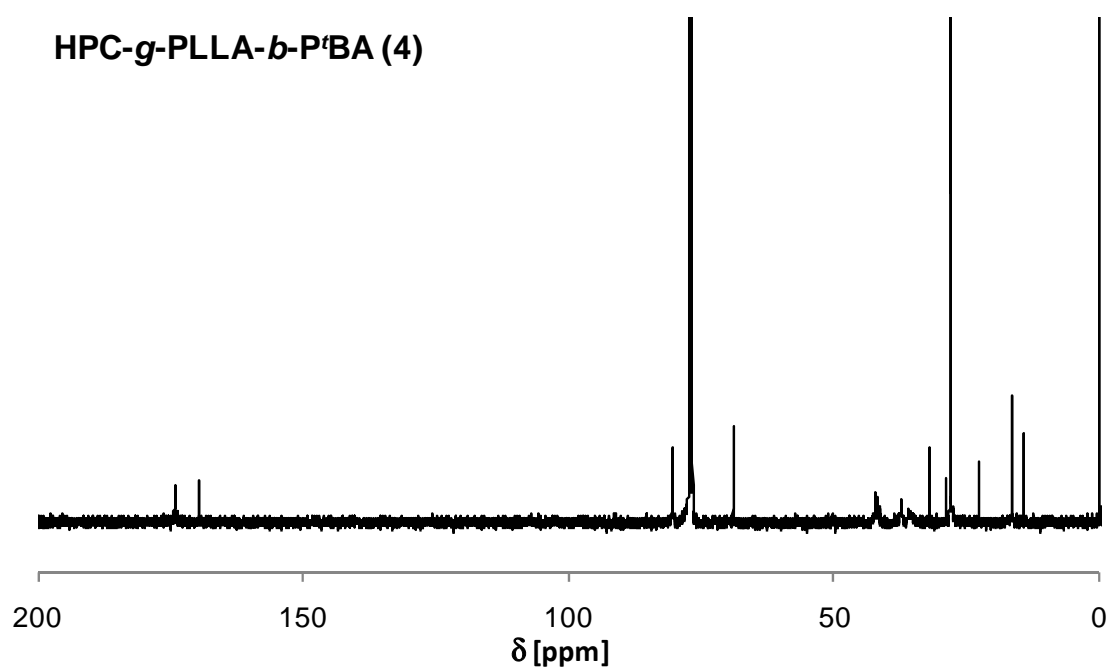

**Fig. S5**  $^{13}\text{C}$ -NMR of copolymer **5** in MeOD.

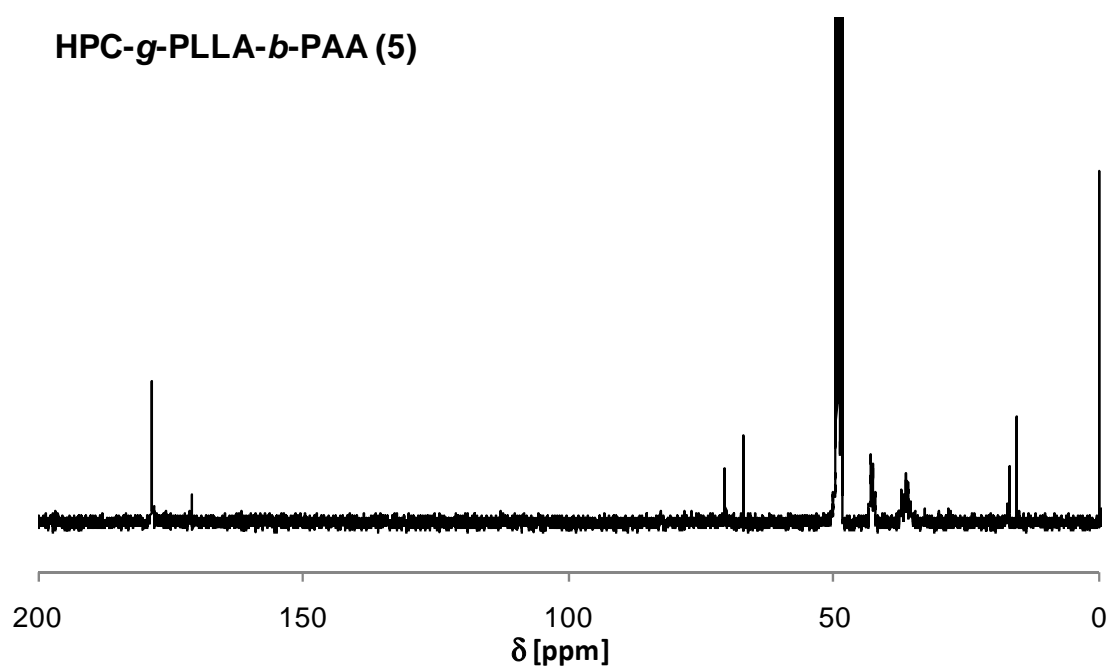

Supplement: c1py00195g.pdf [file c1py00195g.pdf]
